# Supplementary material for: Impact of Different Strategies for Delivering Supplemental Zinc on Selected Fecal Markers of Environmental Enteric Dysfunction among Young Laotian Children: A Randomized Controlled Trial
Source: PubMed Central journal article supplement (PMC7543857; doi:10.4269/ajtmh.20-0106), 2020-07-06
Supplement: tpmd200106.SD1.pdf [file tpmd200106.SD1.pdf]

## Supplementary Tables

Supplementary Table 1: Associations between baseline MPO, NEO and CAL concentrations and concurrent growth indicators among young Laotian children

|                      | MPO <sup>1</sup>         |         | NEO <sup>1</sup>         |         | CAL <sup>1</sup>         |              |
|----------------------|--------------------------|---------|--------------------------|---------|--------------------------|--------------|
|                      | Coefficient <sup>2</sup> | p-value | Coefficient <sup>2</sup> | p-value | Coefficient <sup>2</sup> | p-value      |
| Length               | -0.01 (-0.04, 0.03)      | 0.734   | 0.00 (-0.04, 0.05)       | 0.824   | 0.02 (-0.03, 0.06)       | 0.424        |
| Weight               | -0.05 (-0.16, 0.06)      | 0.392   | -0.01 (-0.13, 0.12)      | 0.918   | 0.04 (-0.09, 0.17)       | 0.566        |
| MUAC                 | 0.00 (-0.10, 0.11)       | 0.925   | 0.06 (-0.06, 0.18)       | 0.304   | 0.15 (0.02, 0.27)        | <b>0.021</b> |
| Low MUAC (<=12.5 cm) | 0.02 (-0.29, 0.34)       | 0.888   | -0.12 (-0.48, 0.24)      | 0.506   | -0.17 (-0.55, 0.21)      | 0.378        |
| LAZ                  | -0.03 (-0.12, 0.07)      | 0.596   | 0.01 (-0.10, 0.12)       | 0.813   | 0.04 (-0.07, 0.16)       | 0.450        |
| Stunting             | 0.07 (-0.13, 0.27)       | 0.512   | 0.05 (-0.18, 0.27)       | 0.678   | -0.20 (-0.44, 0.04)      | 0.098        |
| WAZ                  | -0.06 (-0.17, 0.04)      | 0.232   | -0.01 (-0.13, 0.11)      | 0.886   | 0.02 (-0.10, 0.15)       | 0.723        |
| Underweight          | 0.11 (-0.11, 0.33)       | 0.338   | 0.19 (-0.06, 0.44)       | 0.130   | 0.04 (-0.22, 0.30)       | 0.794        |
| WLZ                  | -0.07 (-0.17, 0.03)      | 0.180   | -0.04 (-0.16, 0.08)      | 0.531   | -0.01 (-0.13, 0.12)      | 0.888        |
| Wasting              | 0.18 (-0.16, 0.52)       | 0.296   | -0.14 (-0.53, 0.24)      | 0.473   | 0.42 (0.02, 0.83)        | <b>0.042</b> |

<sup>1</sup>MPO, CAL and NEO concentrations are log-transformed.

<sup>2</sup>Estimates are regression coefficients and 95% confidence interval and models were adjusted for age at enrollment, sex and district of enrolment.

CAL: calprotectin; LAZ: length-for-age z-score; MPO: myeloperoxidase; MUAC: mid-upper arm circumference; NEO: neopterin; WAZ, weight-for-age z-score; WLZ, weight-for-length z-score.

Supplementary Table 2: Associations between endline MPO, NEO and CAL concentrations and concurrent growth indicators among young Laotian children

|                      | MPO <sup>1</sup>         |         | NEO <sup>1</sup>         |         | CAL <sup>1</sup>         |              |
|----------------------|--------------------------|---------|--------------------------|---------|--------------------------|--------------|
|                      | Coefficient <sup>2</sup> | p-value | Coefficient <sup>2</sup> | p-value | Coefficient <sup>2</sup> | p-value      |
| Length               | -0.01 (-0.03, 0.02)      | 0.465   | -0.00 (-0.04, 0.04)      | 0.922   | -0.03 (-0.07, 0.01)      | 0.197        |
| Weight               | -0.05 (-0.13, 0.02)      | 0.126   | -0.00 (-0.11, 0.10)      | 0.897   | -0.11 (-0.24, 0.00)      | 0.060        |
| MUAC                 | -0.03 (-0.11, 0.04)      | 0.365   | 0.05 (-0.06, 0.17)       | 0.366   | -0.10 (-0.24, 0.03)      | 0.130        |
| Low MUAC (<=12.5 cm) | -0.17 (-0.49, 0.14)      | 0.279   | 0.00 (-0.48, 0.48)       | 0.996   | -0.13 (-0.67, 0.41)      | 0.632        |
| LAZ                  | -0.03 (-0.10, 0.05)      | 0.498   | -0.00 (-0.12, 0.11)      | 0.890   | -0.08 (-0.21, 0.05)      | 0.214        |
| Stunting             | 0.08 (-0.05, 0.22)       | 0.232   | 0.01 (-0.20, 0.22)       | 0.898   | 0.16 (-0.07, 0.40)       | 0.177        |
| WAZ                  | -0.06 (-0.14, 0.02)      | 0.143   | -0.02 (-0.14, 0.10)      | 0.789   | -0.14 (-0.28, -0.00)     | <b>0.044</b> |
| Underweight          | 0.08 (-0.08, 0.25)       | 0.324   | -0.06 (-0.31, 0.19)      | 0.626   | 0.32 (0.04, 0.60)        | <b>0.024</b> |
| WLZ                  | -0.07 (-0.16, 0.01)      | 0.093   | -0.02 (-0.15, 0.11)      | 0.806   | -0.15 (-0.29, -0.00)     | <b>0.044</b> |
| Wasting              | 0.00 (-0.34, 0.34)       | 0.984   | 0.37 (-0.15, 0.89)       | 0.162   | 0.14 (-0.44, 0.73)       | 0.629        |

<sup>1</sup>MPO, CAL and NEO concentrations are log-transformed.

<sup>2</sup>Estimates are regression coefficients and 95% confidence interval and models were adjusted for treatment group, age at endline, sex and district of enrolment.

CAL: calprotectin; LAZ: length-for-age z-score; MPO: myeloperoxidase; MUAC: mid-upper arm circumference; NEO: neopterin; WAZ, weight-for-age z-score; WLZ, weight-for-length z-score.

## Supplementary Figures

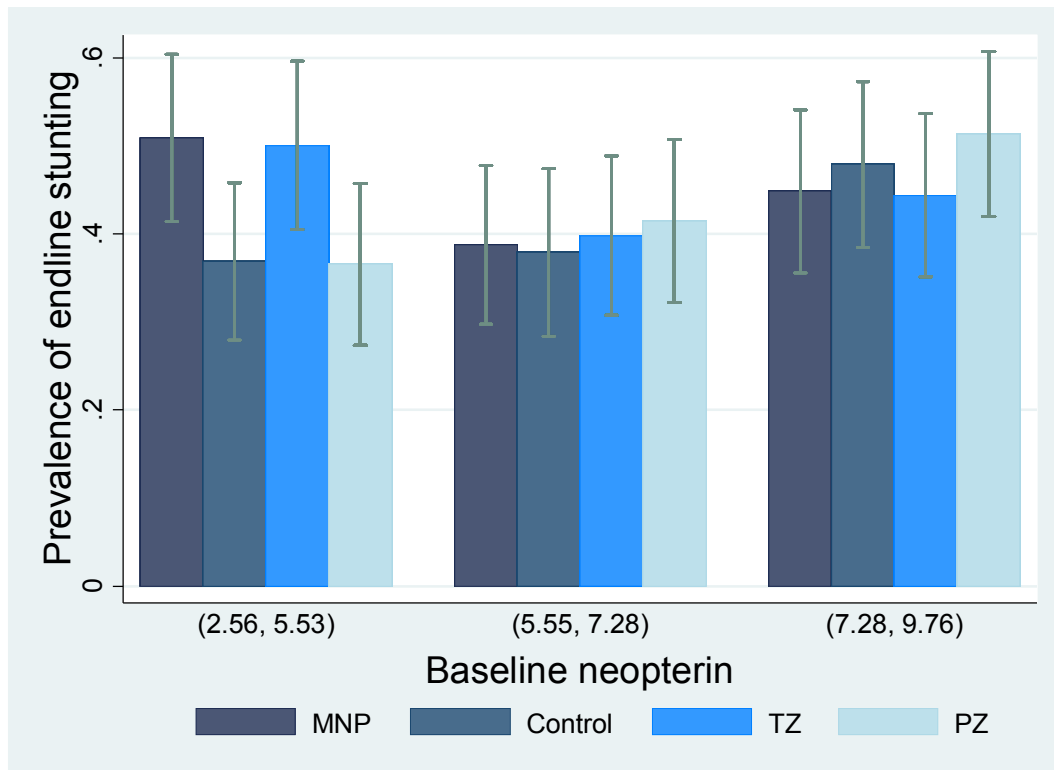

Supplementary Figure 1: Effect modification of baseline NEO concentrations on the impact of study intervention on endline stunting among young Laotian children. MNP=Micronutrient powder; PZ= preventive zinc; TZ=Therapeutic zinc.

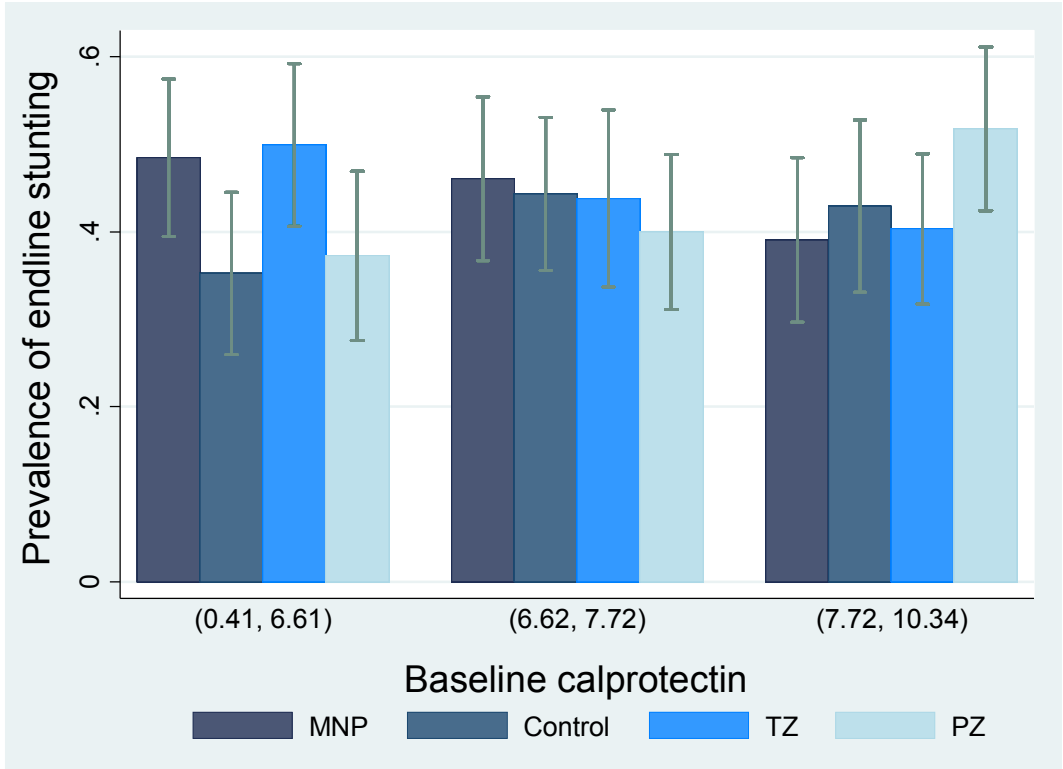

Supplementary Figure 2: Effect modification of baseline CAL concentrations on the impact of study intervention on endline stunting among young Laotian children. MNP= Micronutrient powder; PZ= preventive zinc; TZ=Therapeutic zinc.

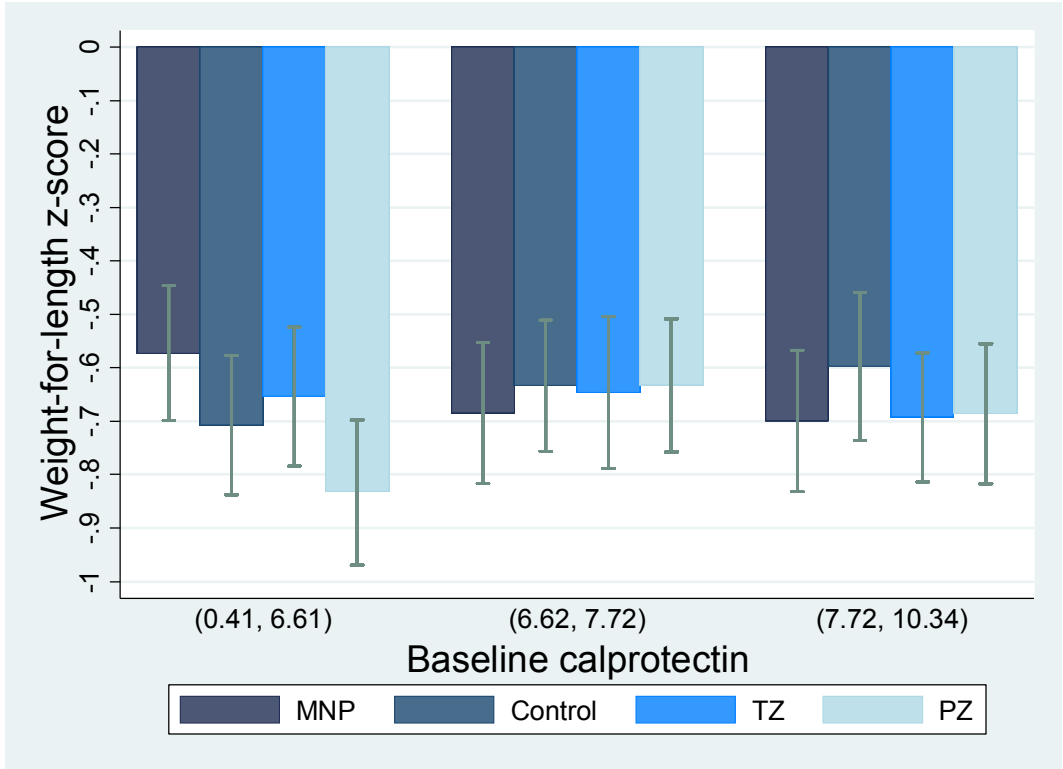

Supplementary Figure 3: Effect modification of baseline CAL concentrations on the impact of study intervention on endline weight-for-length z-score among young Laotian children. MNP=Micronutrient powder; PZ= preventive zinc; TZ=Therapeutic zinc
